# Supplementary material for: Description of a new Pangasius (Valenciennes, 1840) species, from the Cauvery River extends distribution range of the genus up to South Western Ghats in peninsular India
Source: PeerJ. 2022 Nov 8;10:e14258. doi: 10.7717/peerj.14258 (PMC9651045; doi:10.7717/peerj.14258)
Supplement: Supplemental Information 1 [file peerj-10-14258-s001.xlsx]

## Sheet: Sheet1
	Holotype	Paratype 1	Paratype 2	Paratype 3	Paratype 4	Paratype 5	Paratype 6	Paratype 7	Paratype 8	Paratype 9	Paratype 10	Paratype 11	Paratype 12	Paratype 13	Paratype 14	Paratype 15	Paratype 16
Standard length	211.62	257.59	200.86	226.2	169.28	177.2	184.58	169.04	203.56	161.94	164.72	158.23	130.58	331	313	420	382
Head length	41.93	50.07	39.92	45.51	35.05	36.27	38.56	35.1	40.3	32.11	33.49	32.75	27.97	67.13	66.95	80.99	76.49
Head width	32.01	38.81	28.8	35.49	25.47	28.13	28.59	23.56	31.59	23.33	23.07	23.15	19.14	51.37	46.64	62.24	54.59
Head depth	32.02	33.41	33.2	32.24	23.66	27.61	28.68	23.22	29.87	22.8	23.77	23.3	19.57	48.77	53.2	68.49	65.91
Predorsal length	69.7	87.74	68.93	78.78	57.93	61.19	64.9	55.73	69	55.81	54.42	54.03	45.51	111.71	111.29	138.77	128.41
Preanal length	114.78	151.06	109.7	125.31	86.12	97.7	112.35	99.54	118.75	94.91	95.69	92.94	77.13	184.29	174.78	229.93	213.77
Prepelvic length	88.65	108.77	87.76	103.38	73.81	79.61	82.56	74.13	87.91	69.12	69.5	71.5	56.66	137.9	132.68	184.28	168.27
Prepectoral length	41.46	46.94	41.87	42.78	33.43	34.25	36.51	33.46	38.75	33.8	32.08	33.19	27.21	64.31	61.89	74.22	69.76
Body depth at anus	37.02	57.15	36.48	46.96	31.5	35.64	37.4	29.62	36.12	29.96	29.7	28.92	21	67.7	70.14	98.28	89.67
Length of caudal peduncle	38.21	39.114	36.11	38.73	29.27	29.7	31.32	28.9	36.3	31.06	27.63	29.26	23.05	55.2	45.77	63.88	58.2
Depth of caudal peduncle	14.3	18.12	13.6	16.26	10.96	12.37	14.86	12.02	13.7	11.89	11.21	11.16	8.96	26.13	25.57	33.73	30.08
Pectoral spine length	38.96	41.85	32.57	36.8	31.36	32.76	35.77	29.47	30.64	31.04	28.97	28.86	25.78	Broken	Broken	Broken	Broken
Pectoral fin length	49.13	50.58	40.03	43.64	38.08	37.2	35.48	32.65	34.35	29.06	33.86	19.95	22.76	64.66	64.58	70.48	79.53
Dorsal-spine length	34.12	40.58	29.53	32.53	27.78	30.93	34.26	25.68	32.73	27.7	24.07	26.31	21.2	48.24	46.53	65.53	61.54
Length of dorsal fin base	17.83	19.16	15.09	16.99	14.17	12.63	16.42	11.33	13.59	12.44	15.53	11.03	8.72	25.55	27.58	29.8	28.18
Pelvic fin length	25.82	27.67	22.67	26.43	19.79	22.65	23.76	19.92	22.7	19.55	21.21	20.61	15.11	38.28	37.07	46.69	45.68
Length of anal fin base	54.79	66.56	53.83	60.54	44.59	42.11	47.64	47.1	49.24	40.36	41.38	41.26	32.25	80.91	85.19	114.81	94.56
Caudal fin length	54.01	58.97	50.19	57.46	40.12	46.46	53.37	43.39	50.91	43.4	38.83	41.34	33.63	78.15	74.48	86.59	85.98
Length of adipose fin base	4.16	5.75	5.54	5.01	3.88	2.64	3.78	2.75	4.75	2.76	3.86	2.63	3.36	9.25	9.19	10.2	10.54
Maximum height of adipose fin	4.82	5.12	4.79	5.08	3.6	4.44	3.8	3.57	4.39	4.01	3.27	3.8	3	6.06	9.37	Broken	7.59
Dorsal fin to adipose distance	71.78	89.57	64.28	70.39	55.77	61.43	58.64	57.45	68.08	55.09	59.34	51.11	40.05	110.9	108.36	128.01	123.85
Post adipose distance	51.83	111.27	45.54	51.16	39.93	40.83	42.33	38.26	48.17	38.18	38.88	36.56	28.41	69	69.61	80.9	72.93
Snout length	16.24	19.54	15.36	18.61	13.17	14.17	14.84	12.69	15.32	12.3	12.02	12.77	10.35	24.09	25.59	38.46	28.97
Mouth width	17.83	22.7	15.42	20.6	14.61	16.61	19.02	14.2	17.09	13.89	13.91	14.29	11.45	29.28	29.4	35.64	35.02
Mouth width gape	14.16	17.18	13.61	16.39	12.66	13.04	16.67	10.53	14.35	11.25	10.27	12.21	9.33	21.5	26.01	28.53	27.4
Inter-orbital distance	23.46	30.65	23.11	25.79	17.67	20.58	22.18	18.02	22.77	20.09	16.64	17.55	13.56	41.49	37.37	49	46.1
Eye diameter	7.57	7.56	7.75	8.18	7.39	7.72	8.15	6.89	8.08	6.41	7.09	6.34	5.41	9.13	9.12	10.18	9.5
Maxillary barbel length	31.35	31.69	31.72	30.19	27.81	25.26	28.62	25.85	26.24	29.71	39.41	32.25	22.56	36.78	38.29	51.65	55.13
Mandibular barbel length	21.27	16.71	20.43	22.81	18.37	17.42	9.79	14.97	18.6	22.23	20.31	22.84	15.58	34.34	36.05	41.38	35.85
Premaxillary toothplate transverse width	11.82	13.69	11.48	13.78	10.01	10.43	13.08	9.79	10.9	7.83	7.48	9.51	6.59	18.75	19.16	20.92	21.35
Palatal toothplate transverse width	8.2	10.21	8.24	10.89	7.61	8.66	8.17	7.58	8.27	5.74	5.36	6.35	5.26	14.92	13.93	17.42	16.36
